# Supplementary material
Source: HighWire-hosted journal article supplement (doi:10.1101/rna.078863.121)
Supplement: Supplementary_Information.docx [file Supplementary_Information.docx]

Supplementary Information

## **Unique anticodon loop conformation with flipped-out wobble nucleotide in the crystal structure of unbound tRNAVal**

Hyeonju Jeong1 and Jungwook Kim1*


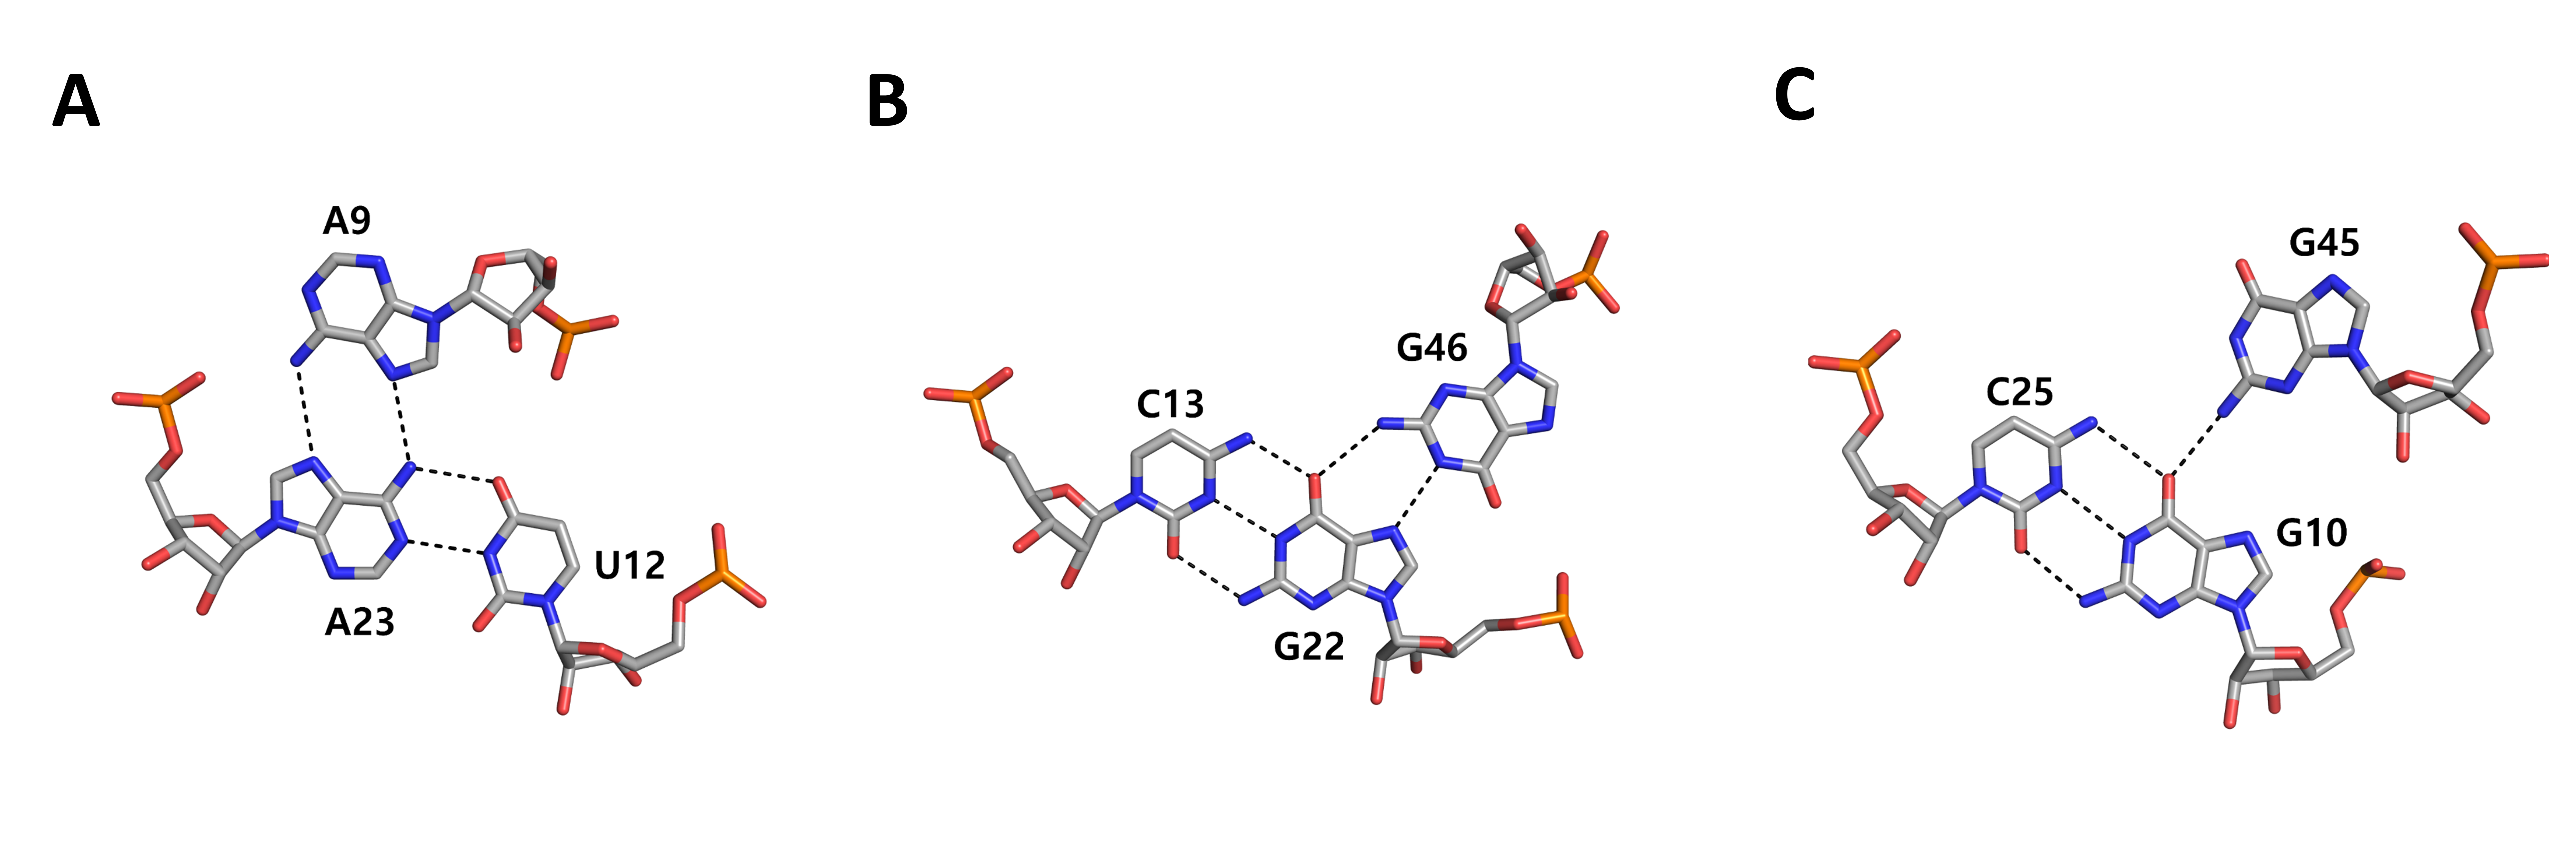


**Supplementary Figure S1 The geometry of base triplet motifs found in D stem**. The interactions between Watston-Crick base pair and third base are observed in both NCS tRNA molecules. (A)U12∙A23-A9 (B) C13∙G22-G46 (C) G10∙C25-G45


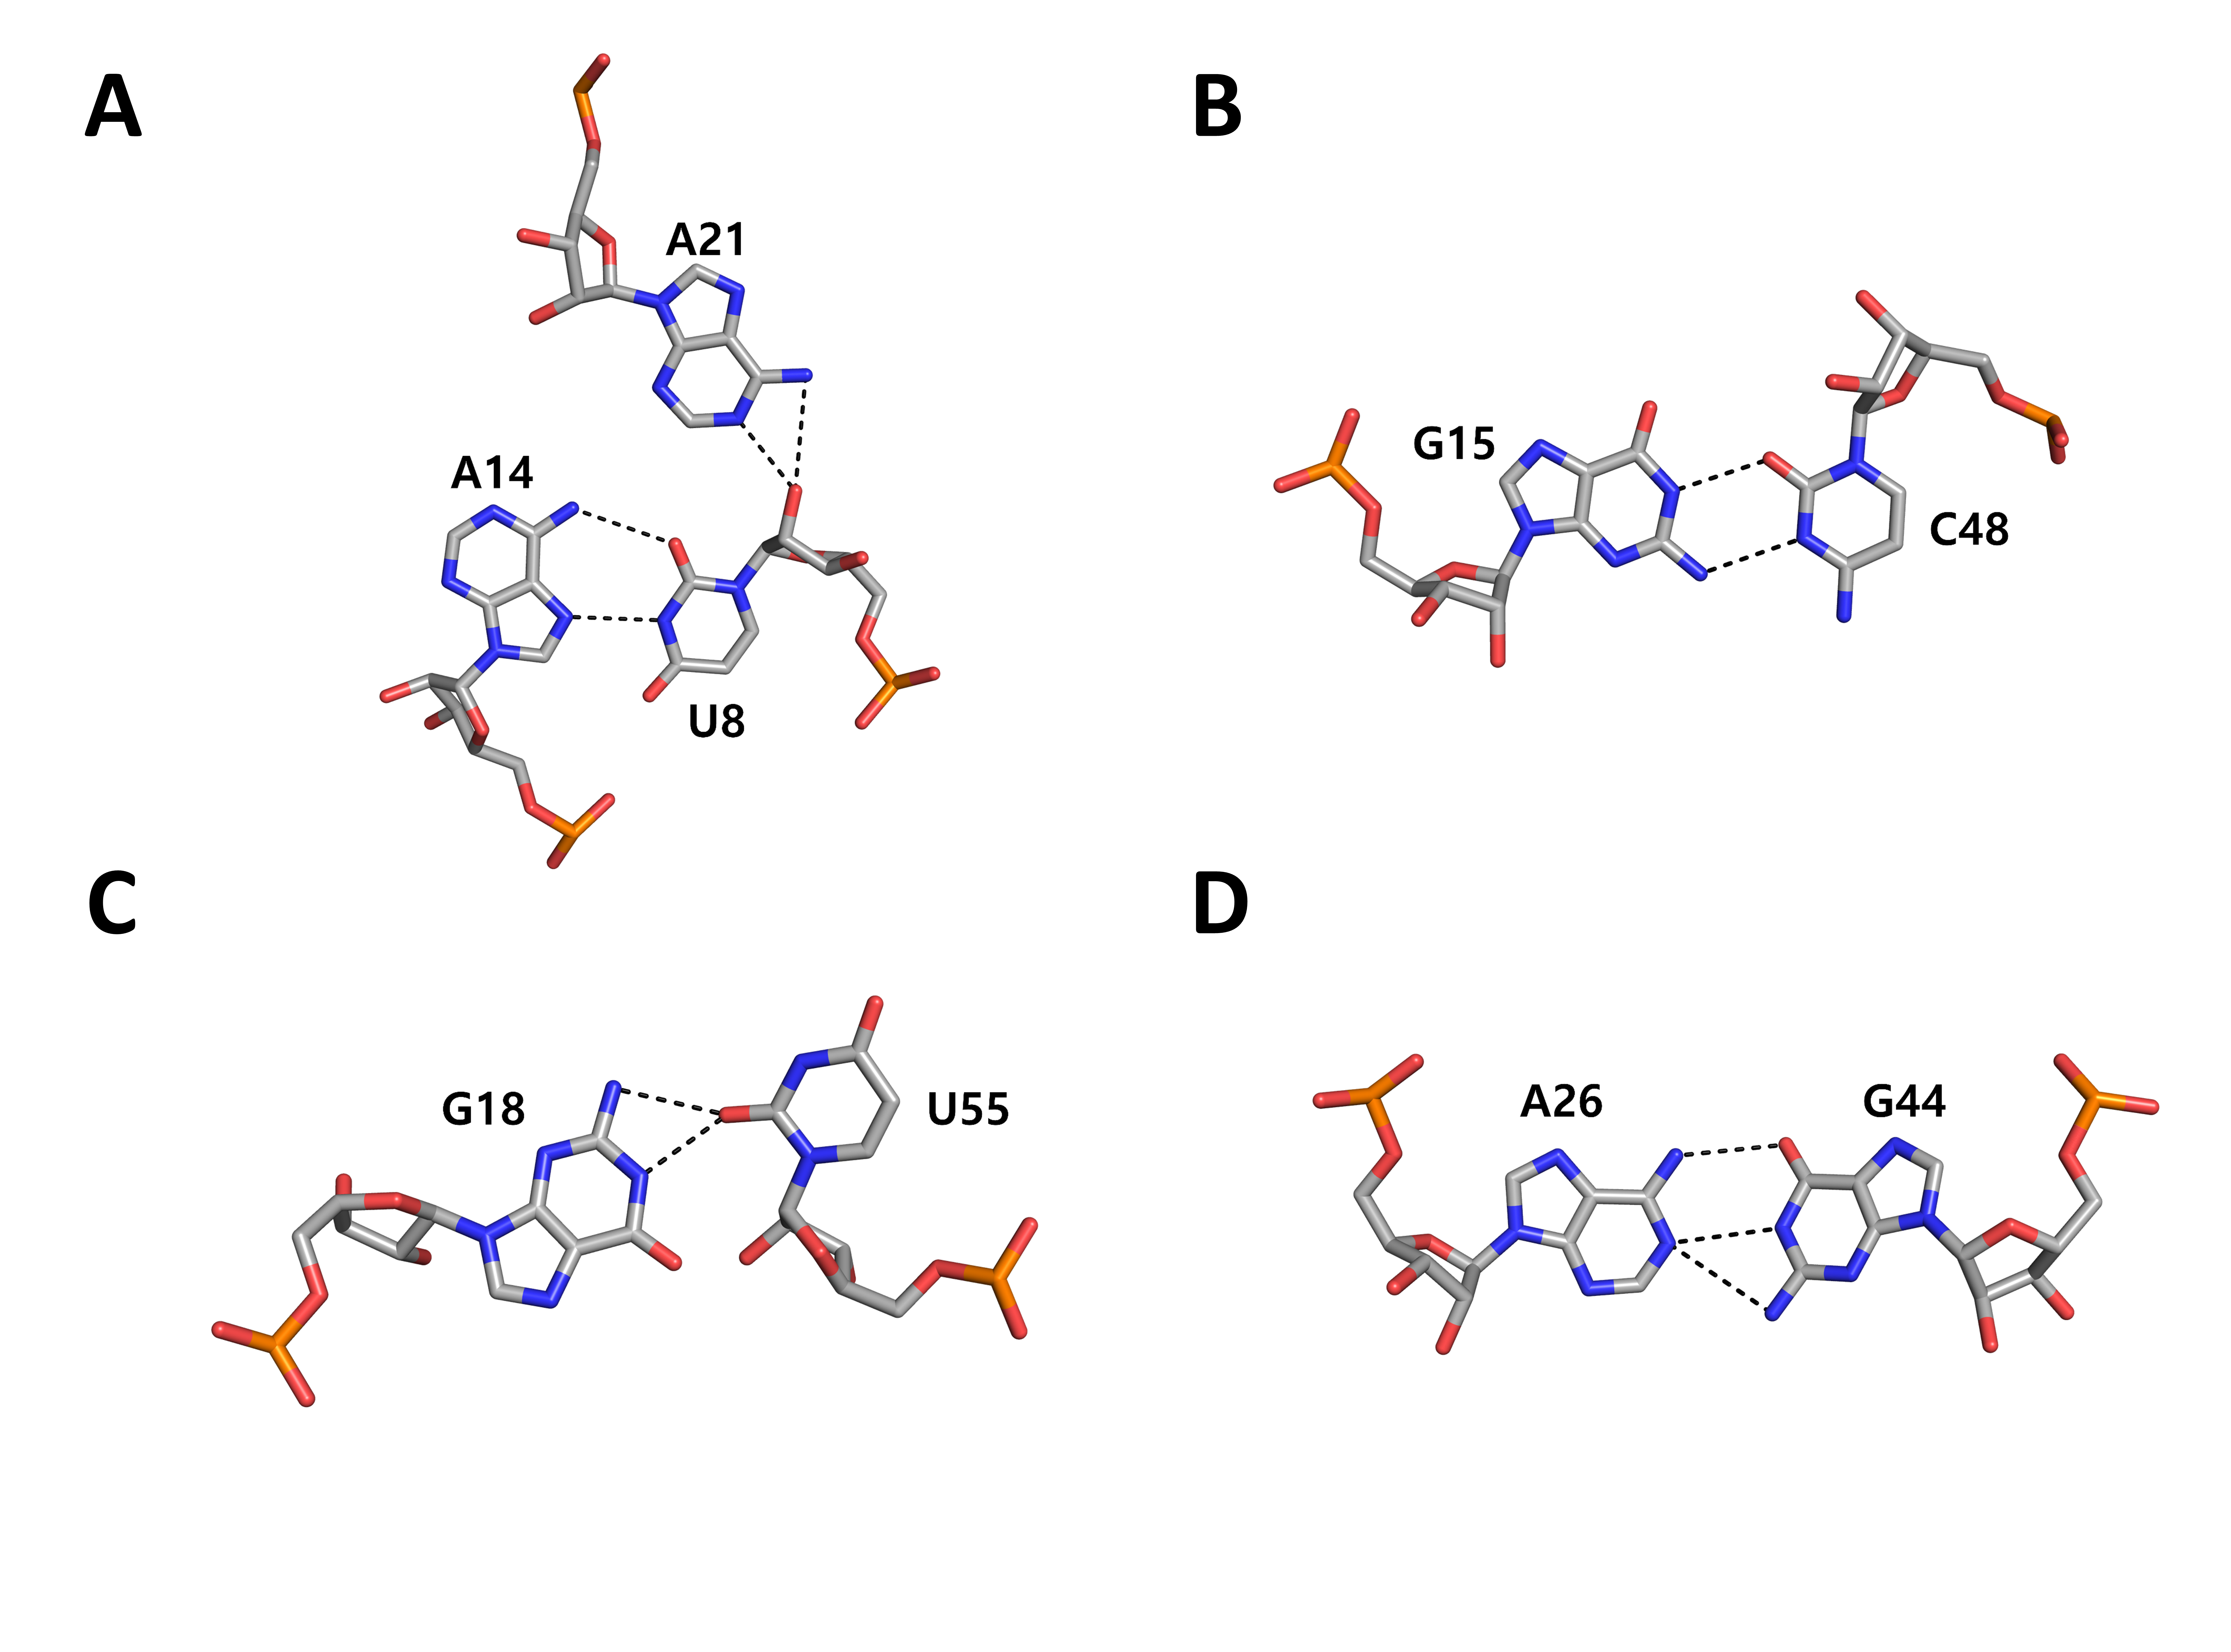


**Supplementary Figure S2 The geometry of tertiary interactions of E. coli tRNAVal1**. (A) Reverse Hoogsteen base pair found in U8∙A14 which is located in linker of acceptor stem and D stem. U8 forms hydrogen bond with A21. (B-C) The interactions between D stem and TΨC stem-loop. (B) G15∙C48 (C) G18-U55 (D) The tertiary interaction between A26-G44 in D stem.


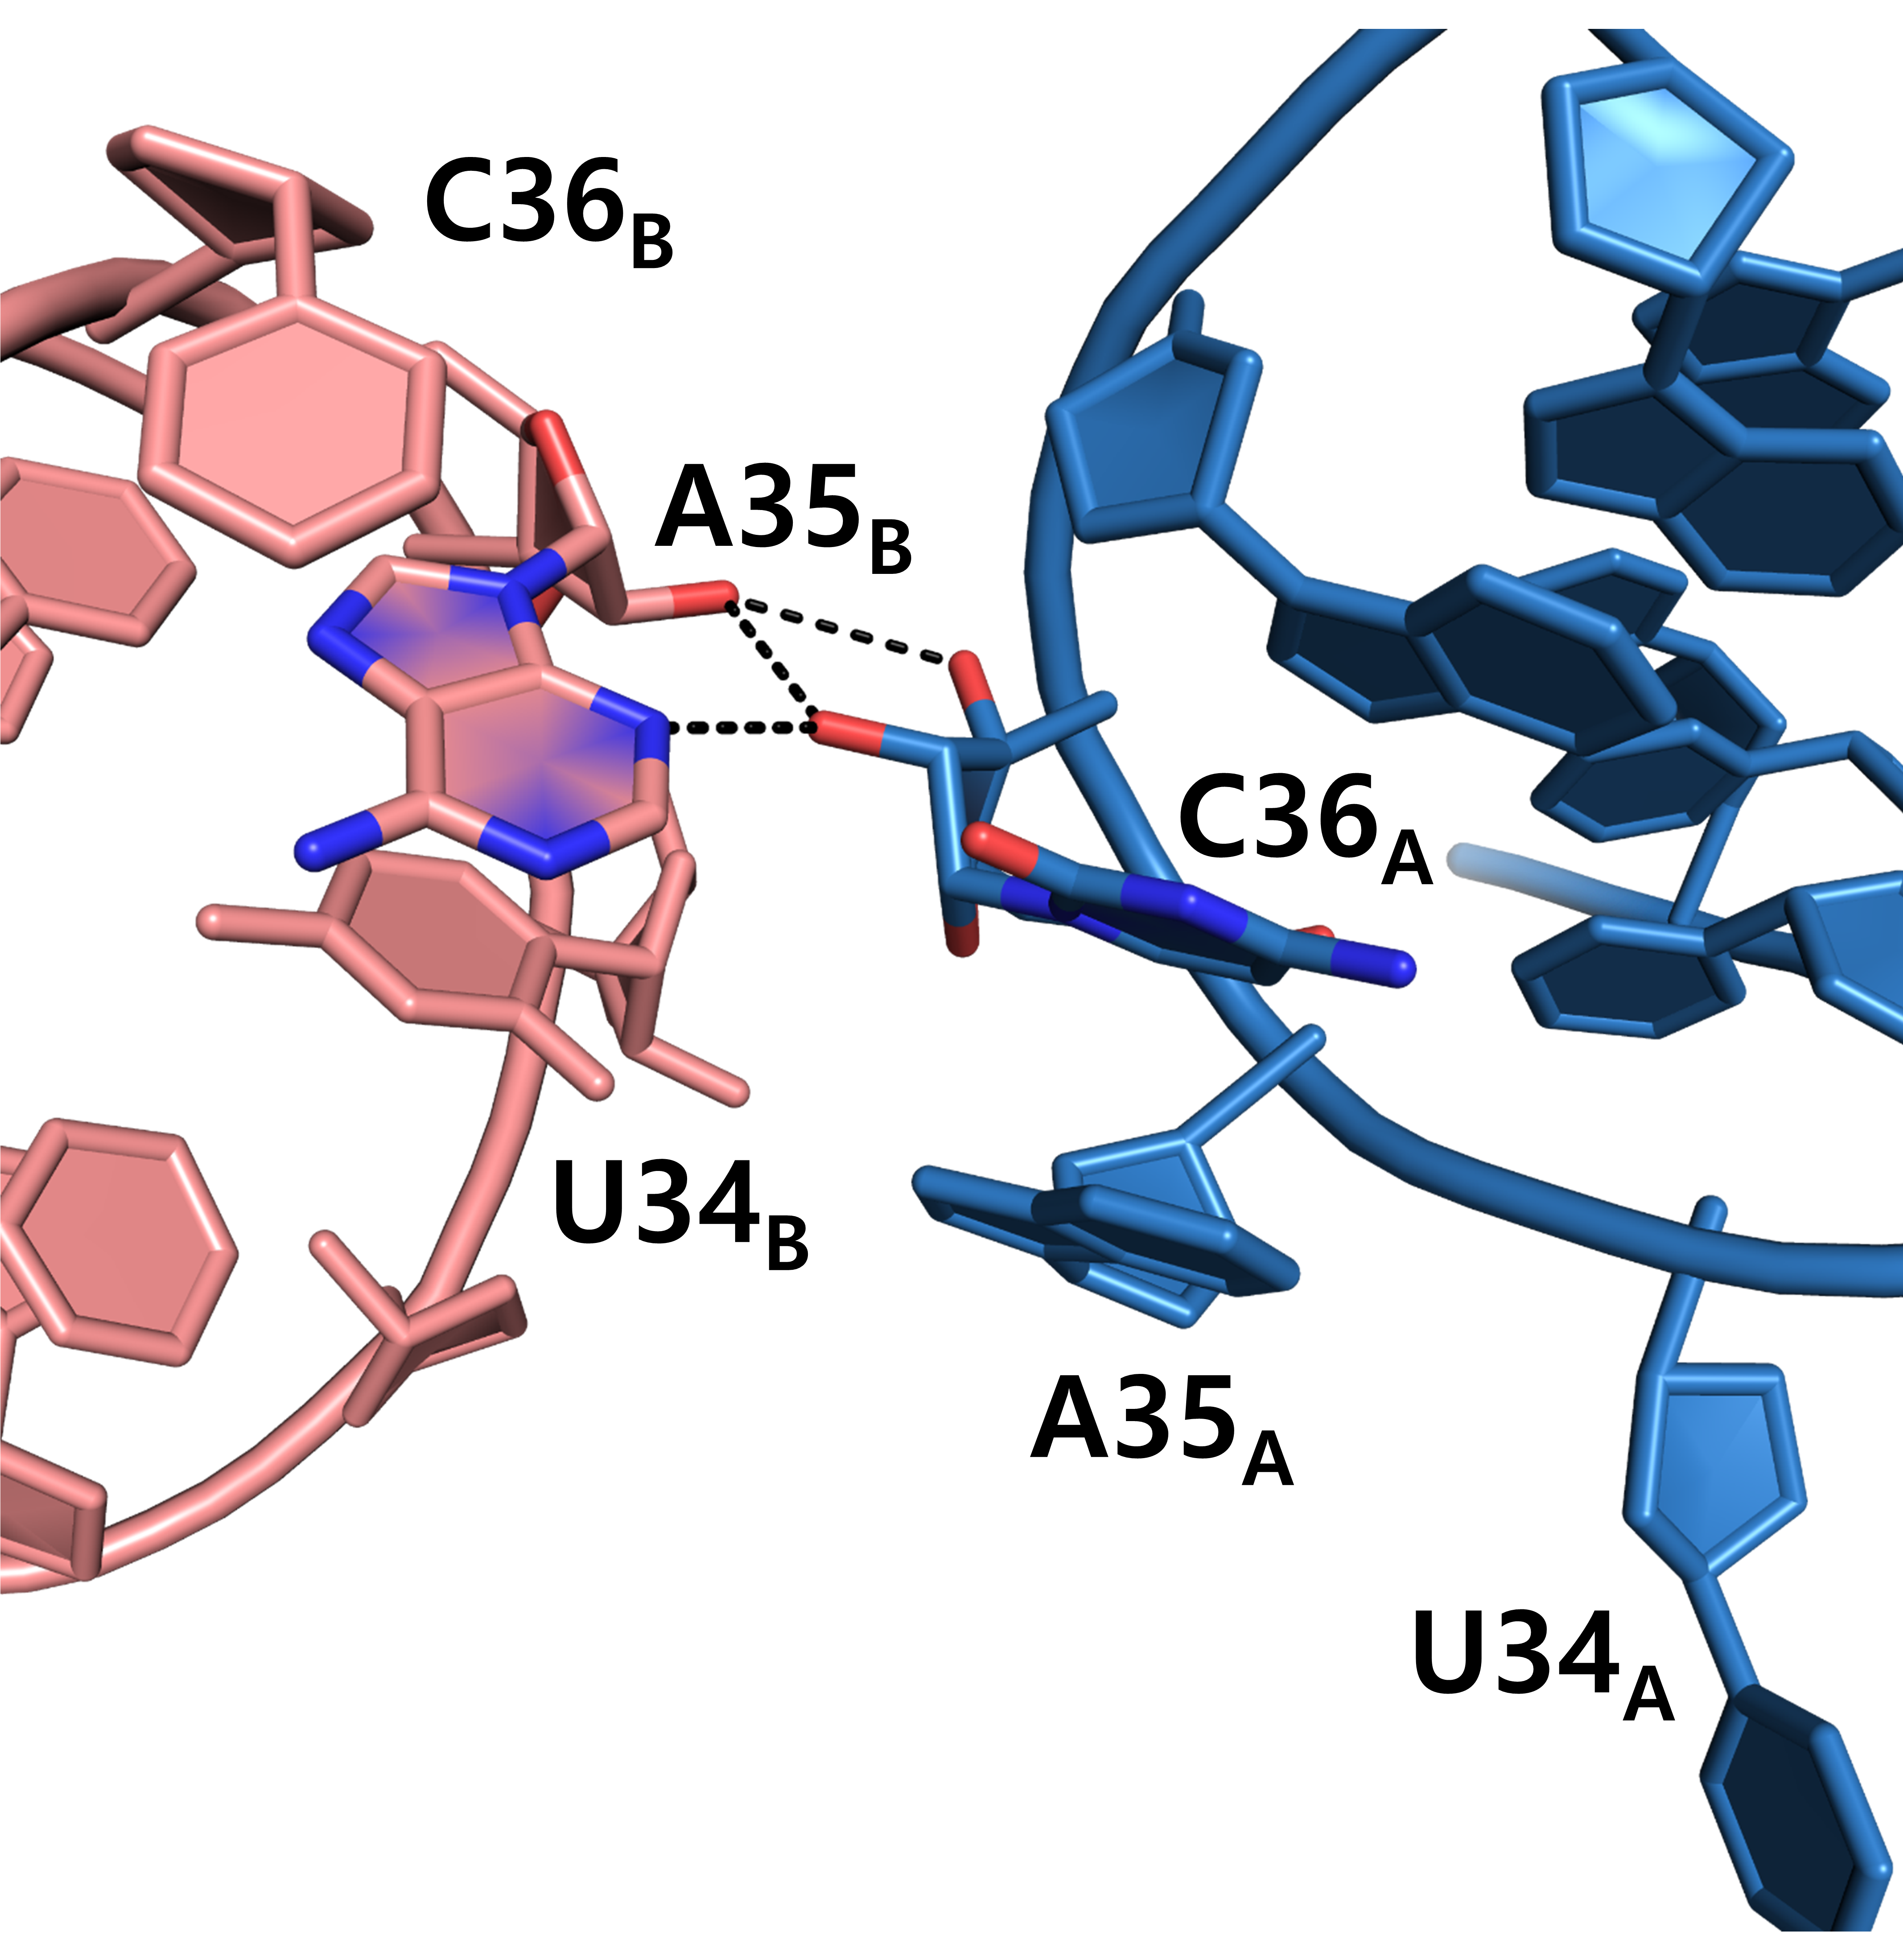


**Supplementary Figure S3. Dimerization interface interaction.** Two tRNA molecules are dimerized by hydrogen bond from N3 and 2´-OH of A35B with ribose ring of C36A, with the dimeric interface of 129.8Å2.





**Supplementary Figure S4. Mg2+ coordination**. Mg2+ (green) is coordinated with water molecules (red sphere). Oxygen of tRNA backbone phosphate or nitrogen of base participate Mg2+ coordination in octahedral geometry. (A) OP1 of G19A and five water molecules are coordinated with Mg2+(B) OP1 of G19B and five water molecules are coordinated with Mg2+(C) N7 of G15B and five water molecules are coordinated with Mg2+(D) Mg2+is coordinated by six water molecules surrounded by phosphate backbone from U8B to C13B in the region of D-arm. (E) N7 of G15A and five water molecules are coordinated with Mg2+(F) OP2 of A37B and five water molecules are coordinated with Mg2+


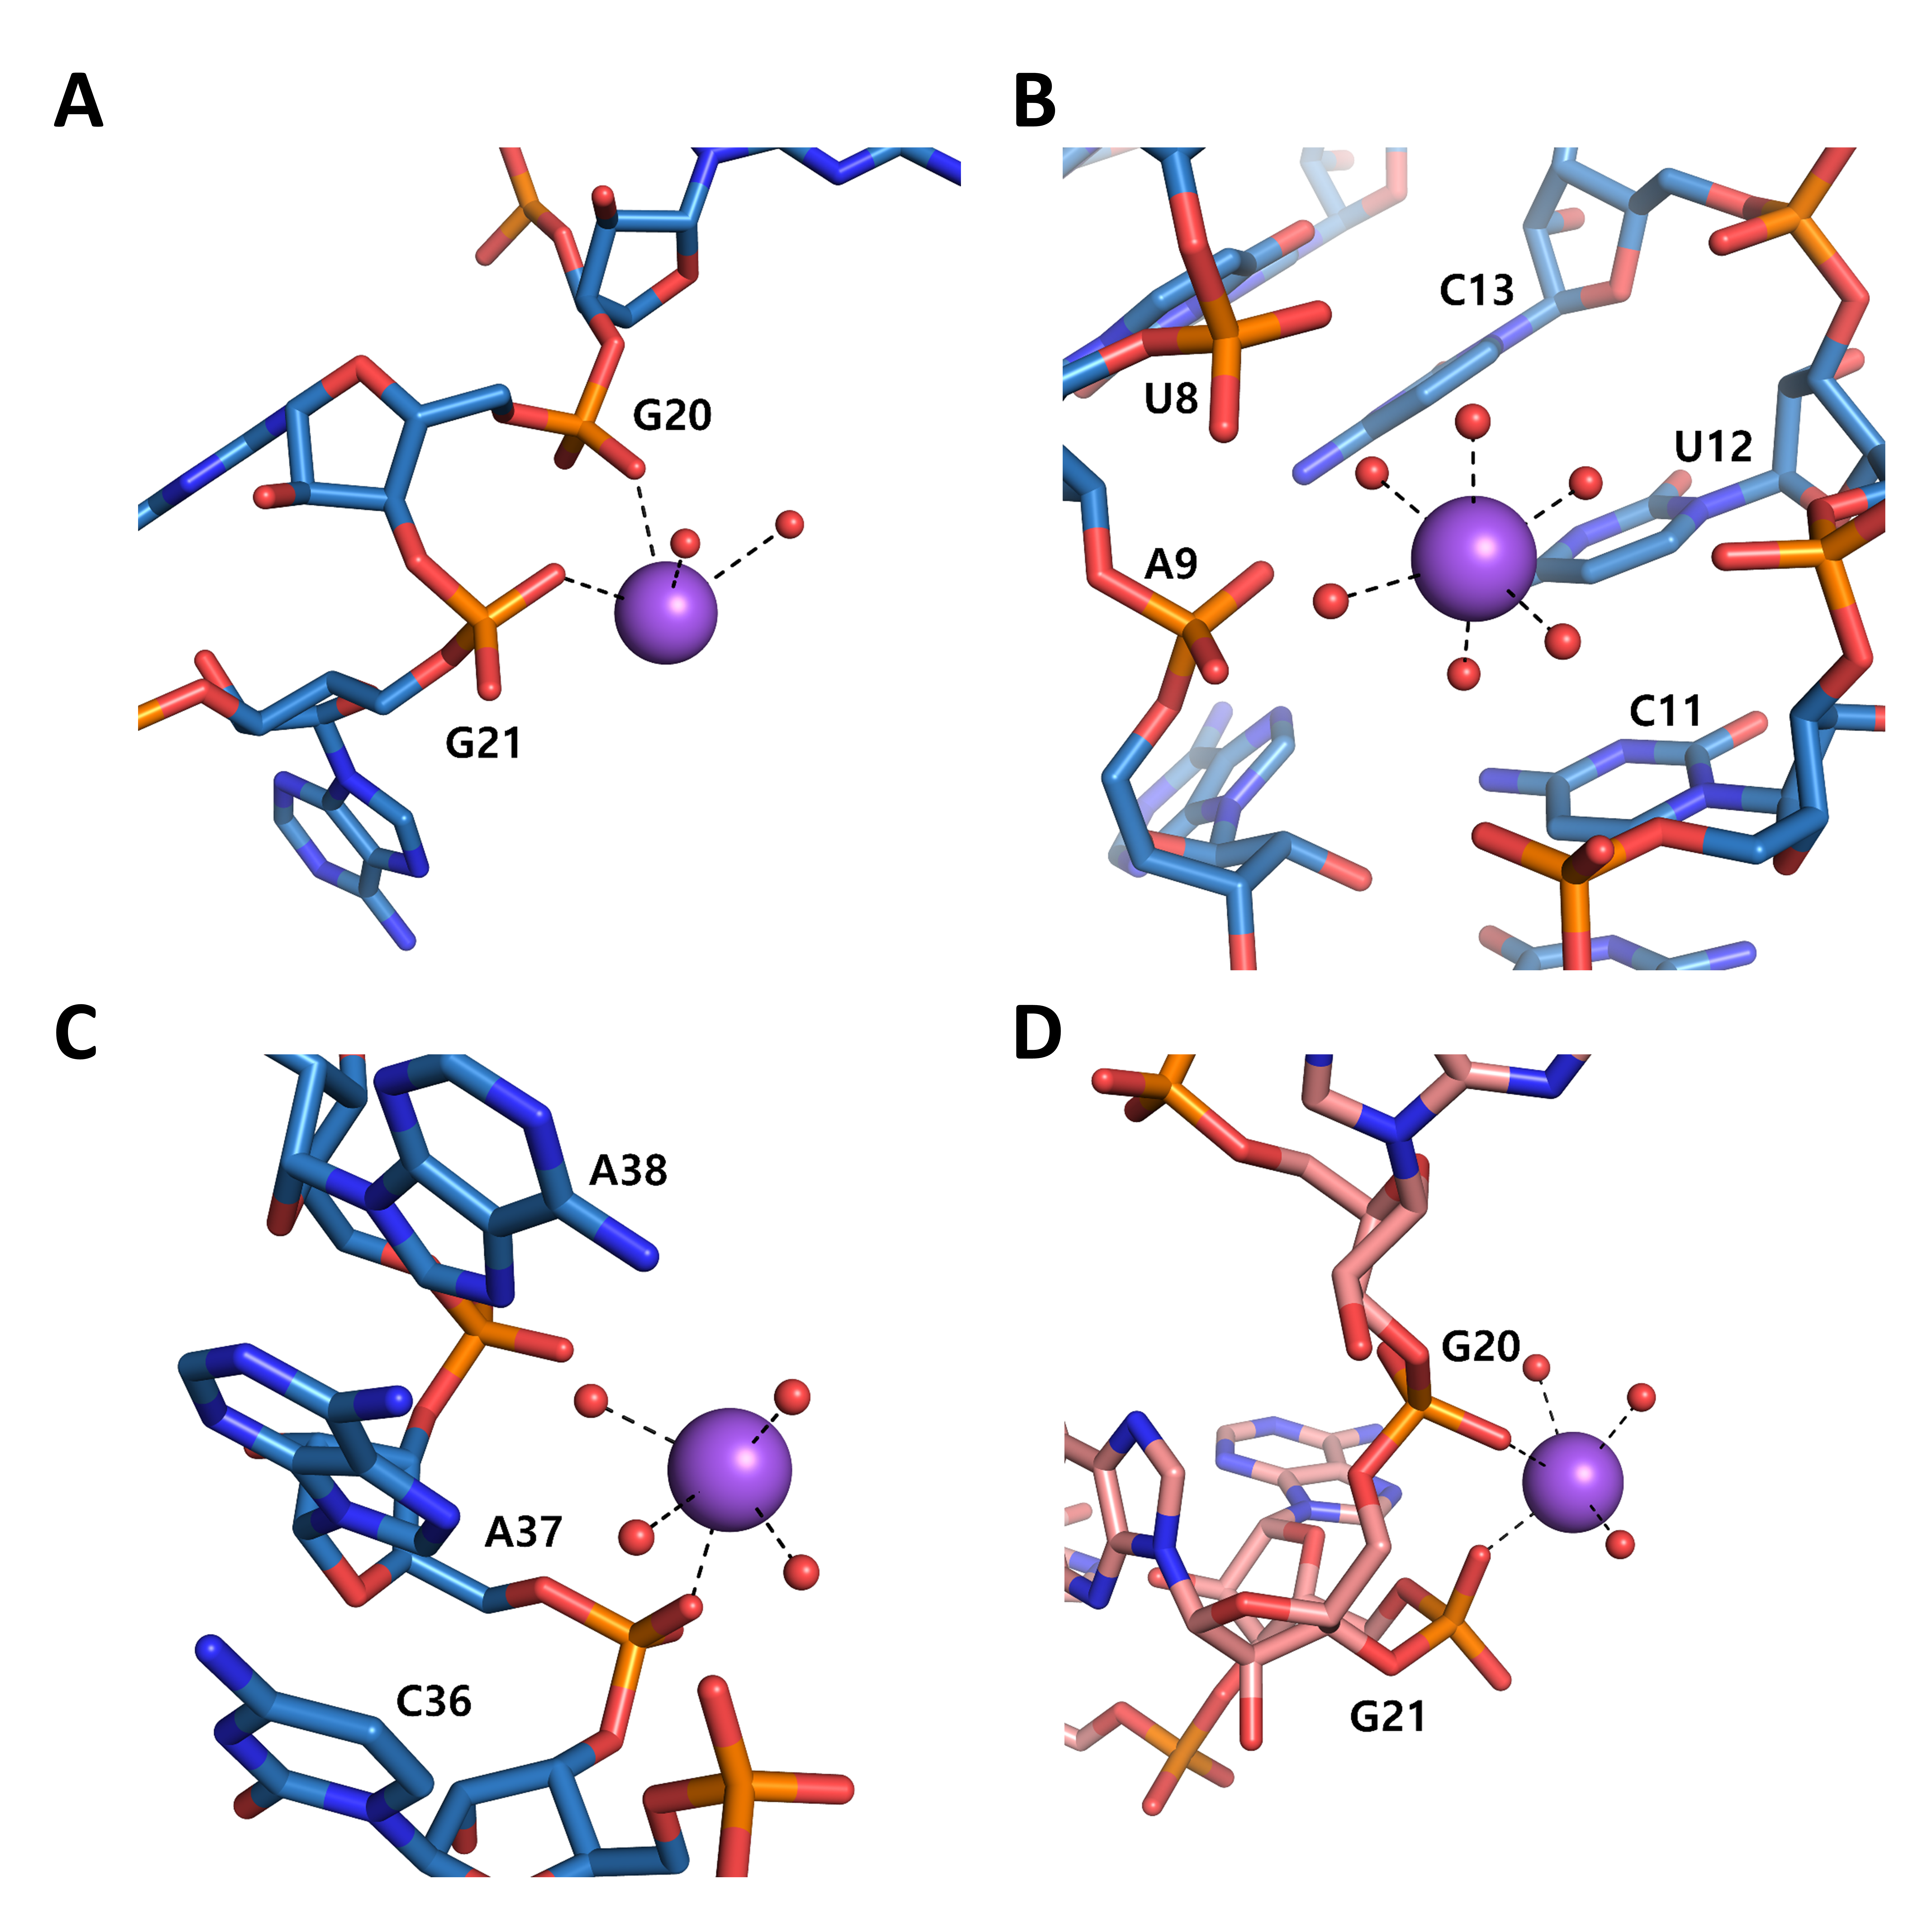


**Supplementary Figure S5. Na+ coordination**. Na+ (purple) is coordinated with water molecules (red sphere). Oxygens of tRNA backbone phosphate participate Na+ coordination in various geometry. (A) OP2 of G20 and OP1 of A21 are participated in Na+ coordination with two water molecules which shows distorted sewsaw geometry. (B) Na+is coordinated by six water molecules surrounded by phosphate backbone from U8A to C13A in the region of D-arm. (C) OP1 of A37A is coordinated with Na+ with four water molecules which shows distorted trigonal bipyramidal geometry. (D) OP1 of G20 and OP2 of A21 are participated in Na+ coordination with three water molecules which shows distorted trigonal geometry.
